# Supplementary material for: NMR Untargeted and HPLC-MS/MS Targeted Metabolomic Approaches for Evaluating Styrene Exposure in the Urine of Shipyard Workers
Source: MDPI journal article supplement (doi:10.3390/toxics12030182), 2024-02-28
Supplement: s1 [file s1]

## **NMR untargeted and HPLC-MS/MS targeted metabolomic approaches for evaluating styrene exposure in the urine of shipyard workers**

Ottavia Giampaoli<sup>a,b</sup>, Fabio Sciubba<sup>a,b</sup>, Giovanna Tranfo<sup>c</sup>, Renata Sisto<sup>c</sup>, Daniela Pigni<sup>c</sup>, Michele De Rosa<sup>d</sup>, Adriano Patriarca<sup>d</sup>, Alfredo Miccheli<sup>a,b</sup>, Anna Rita Fetoni<sup>e</sup>, Laura Tricarico<sup>f</sup> and Mariangela Spagnoli<sup>c,\*</sup>

<sup>a</sup> *NMR-based Metabolomics Laboratory (NMLab), Sapienza University of Rome, Piazzale Aldo Moro 5, 00185, Rome, Italy;*

<sup>b</sup> *Department of Environmental Biology, Sapienza University of Rome, Piazzale Aldo Moro 5, 00185, Rome, Italy;*

<sup>c</sup> *Department of Occupational and Environmental Medicine, Epidemiology and Hygiene, INAIL, Via Fontana Candida 1, 0078, Monte Porzio Catone, Italy;*

<sup>d</sup> *Department of Chemistry, Sapienza University of Rome, Piazzale Aldo Moro 5, 00185, Rome, Italy*

<sup>e</sup> *Department of Neuroscience, Reproductive and Odontostomatological Sciences-Audiology Section, University of Naples Federico II, 80131 Naples, Italy;*

<sup>f</sup> *Catholic University of the Sacred Heart, Faculty of Medicine and Surgery, Largo Agostino Gemelli 8, 00168, Rome, Italy;*

**\*Corresponding Author:** Dr. Mariangela Spagnoli, Department of Occupational and Environmental Medicine, Epidemiology and Hygiene, INAIL, Via Fontana Candida 1, 0078, Monte Porzio Catone, Italy, [m.spagnoli@inail.it](mailto:m.spagnoli@inail.it)

**Keywords:** styrene exposure; NMR-based metabolomics; oxidative stress biomarkers; urinary metabolic profiles

## Supplementary Material

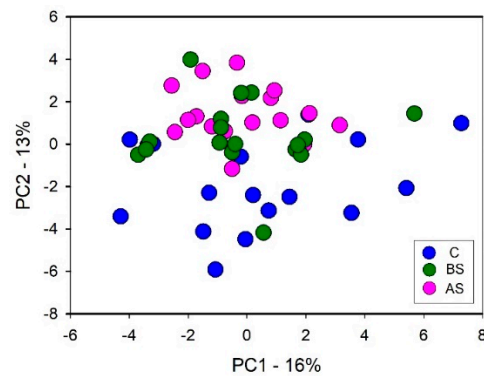

Supplementary Figure S1. Scores plot for PCA performed on non-exposed subjects (C, blue) and exposed subjects BS (green), AS (magenta). Even if the total variance explained is distributed over 8 components, from the analysis of the first two components (29% of the total variance) a tendency towards separation along PC2 between all the samples of subject exposed (BS, AS) and C can be observed.

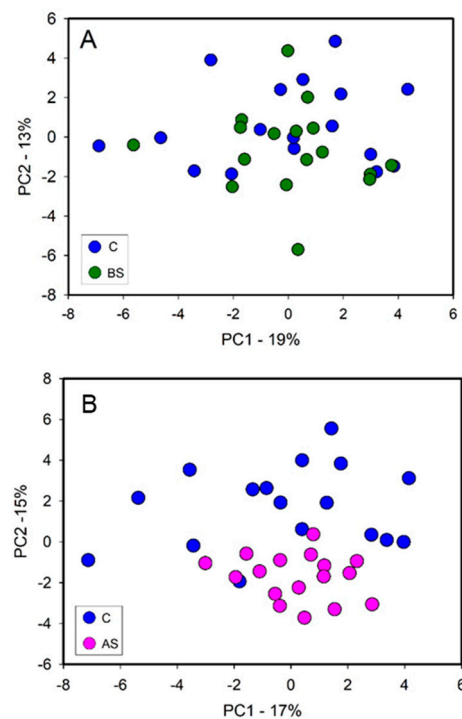

Supplementary Figure S2. PCA scores plots performed on A) subjects BS (green) and C (blue), B) subjects AS (magenta) and C (blue). No obvious groupings are observed between BS subjects and controls, which is mostly observable between AS subjects and controls.

Supplementary Table 1. <sup>1</sup>H chemical shifts of metabolite signals in urines. The resonances choose for the quantification are reported in bold.

bs: broad singlet; d: doublet; dd: doublet of doublets; m: multiplet; q: quadruplet; s: singlet; t: triplet.

| Metabolite                               | Structure                                                                           | <sup>1</sup> H δ ppm                        | Multiplicity                 | Assignment                                                                           |
|------------------------------------------|-------------------------------------------------------------------------------------|---------------------------------------------|------------------------------|--------------------------------------------------------------------------------------|
| 1. Valine (Val)                          | 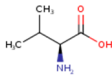   | 0.99<br><b>1.05</b>                         | d<br><b>d</b>                | CH <sub>3</sub><br><b>CH<sub>3</sub>'</b>                                            |
| 2. Isoleucine (Ile)                      |    | 0.92<br><b>1.01</b><br>1.99                 | t<br><b>d</b>                | CH <sub>3</sub><br><b>CH<sub>3</sub></b><br>CH                                       |
| 3. 3-Hydroxyisobutyrate (3-HIB)          |    | <b>1.07</b><br>2.49<br>3.54<br>3.71         | <b>d</b>                     | <b>CH<sub>3</sub></b>                                                                |
| 4. 3-Hydroxy-3-methylbutyrate (3-H-3-MB) |   | <b>1.27</b>                                 | <b>s</b>                     | <b>CH<sub>3</sub>, CH<sub>3</sub>'</b>                                               |
| 5. Lactate                               |  | <b>1.33</b><br>4.11                         | <b>d</b><br>q                | <b>CH<sub>3</sub></b><br>CH                                                          |
| 6. Threonine (Thr)                       |  | <b>1.33</b><br>3.59<br>4.26                 | <b>d</b><br>d<br>m           | <b>CH<sub>3</sub></b><br>α-CH<br>β-CH                                                |
| 7. 2-Hydroxyisobutyrate (2-HIB)          |  | <b>1.36</b>                                 | <b>s</b>                     | <b>CH<sub>3</sub>, CH<sub>3</sub>'</b>                                               |
| 8. Alanine (Ala)                         |  | <b>1.49</b><br>3.78                         | <b>d</b><br>q                | <b>CH<sub>3</sub></b><br>α-CH                                                        |
| 9. Lysine (Lys)                          |  | 1.48<br><b>1.71</b><br>1.89<br>3.02<br>3.74 | m<br><b>m</b><br>m<br>m<br>m | CH <sub>2</sub><br><b>CH<sub>2</sub></b><br>CH <sub>2</sub><br>CH <sub>2</sub><br>CH |
| 10. N-acetylglutamine (NAcGln)           |  | 1.95<br>2.12<br><b>2.27</b><br>4.18<br>7.97 | <b>m</b><br><br>bs           | <b>CH<sub>2</sub></b>                                                                |
| 11. p-Cresol sulphate                    |  | <b>2.35</b><br>7.21<br>7.28                 | <b>bs</b><br>dd<br>dd        | <b>CH<sub>3</sub></b><br>CH, CH'<br>CH, CH'                                          |

|                                    |                                                                                     |                                             |                               |                                                |
|------------------------------------|-------------------------------------------------------------------------------------|---------------------------------------------|-------------------------------|------------------------------------------------|
| 12. Pyroglutamate (pyro-Glu)       | 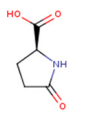   | 2.03<br><b>2.40</b><br>2.50<br>4.19         | m<br><b>m</b><br>m<br>dd      | CH <sub>2</sub><br><b>CH</b><br>CH<br>CH       |
| 13. Glutamine (Gln)                |    | 2.13<br><b>2.46</b><br>3.78                 | m<br><b>m</b><br>t            | CH <sub>2</sub><br><b>CH<sub>2</sub></b><br>CH |
| 14. Citrate                        |    | <b>2.54</b><br>2.69                         | <b>d</b><br>d                 | <b>CH, CH'</b><br>CH, CH'                      |
| 15. Dimethylamine (DMA)            |    | <b>2.73</b>                                 | <b>s</b>                      | <b>CH<sub>3</sub>, CH<sub>3</sub>'</b>         |
| 16. Sarcosine (Sar)                |    | <b>2.78</b>                                 | <b>s</b>                      | <b>CH<sub>3</sub></b>                          |
| 17. Creatine                       |    | <b>3.05</b><br>3.95                         | <b>s</b><br>s                 | <b>CH<sub>3</sub></b><br>CH <sub>2</sub>       |
| 18. Creatinine                     |   | 3.03<br><b>4.05</b>                         | s<br><b>s</b>                 | CH <sub>3</sub><br><b>CH<sub>2</sub></b>       |
| 19. Trimethylamine N-Oxide (TMAO)  |  | <b>3.27</b>                                 | <b>s</b>                      | <b>CH<sub>3</sub></b><br>CH <sub>2</sub>       |
| 20. Taurine (Tau)                  |  | 3.27<br><b>3.43</b>                         | t<br><b>t</b>                 | CH <sub>2</sub><br><b>CH<sub>2</sub></b>       |
| 21. Glycine (Gly)                  |  | <b>3.57</b>                                 | <b>s</b>                      | <b>CH<sub>2</sub></b>                          |
| 22. 4-Hydroxyphenylacetate (4-HPA) |  | <b>6.87</b><br>7.17                         | <b>dd</b><br>dd               | <b>CH,CH</b><br>CH,CH                          |
| 23. Tyrosine (Tyr)                 |  | <b>6.90</b><br>7.18                         | <b>dd</b><br>dd               | <b>2-CH,6-CH</b><br>3-CH,5-CH                  |
| 24. 4-Hydroxybenzoate (4-HBz)      |  | 6.97<br><b>7.76</b>                         | dd<br><b>dd</b>               | 2-CH,6-CH<br><b>3-CH,5-CH</b>                  |
| 25. Tryptophan (Trp)               |  | 7.20<br>7.27<br>7.29<br><b>7.50</b><br>7.70 | m<br>m<br>bs<br><b>d</b><br>d | 5-CH<br>6-CH<br>2-CH<br><b>4-CH</b><br>7-CH    |
| 26. Phenylacetylglutamine (PAGly)  |  | <b>7.36</b><br>7.42                         | <b>m</b><br>m                 | <b>2,4,6-CH</b><br>3,5-CH                      |

|                                              |                                                                                     |                                     |                          |                                        |
|----------------------------------------------|-------------------------------------------------------------------------------------|-------------------------------------|--------------------------|----------------------------------------|
| 27. Mandelic acid (MA)                       | 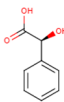   | 5.00<br>7.38-7.43<br>7.42           | s<br>m<br><b>s,s</b>     | CH<br>2-5-CH<br>OH, OH'                |
| 28. Hippurate (Hipp)                         |    | 3.97<br><b>7.55</b><br>7.64<br>7.83 | d<br><b>m</b><br>m<br>m  | CH2<br><b>3,5-CH</b><br>4-CH<br>2,6-CH |
| 29. Pseudouridine (PSI)                      |    | <b>7.67</b>                         | <b>bs</b>                | <b>CH</b>                              |
| 30. Phenylglyoxylic acid (PGA)               |    | 7.60<br><b>7.76</b><br>7.96         | m<br>m<br>m              | 5,3-CH<br><b>4-CH</b><br>6,2-CH        |
| 31. Hypoxanthine (Hyp)                       |    | <b>8.19</b><br>8.21                 | s<br>s                   | 2-CH<br>7-CH                           |
| 32. N1-Methyl-2-pyridone-5-carboxamide (2PY) |    | 3.64<br>6.67<br>7.98<br><b>8.33</b> | s<br>d<br>d<br><b>dd</b> | N-CH3<br>3-CH<br>4-CH<br><b>6-CH</b>   |
| 33. Formate                                  |  | <b>8.46</b>                         | <b>s</b>                 | <b>CH</b>                              |
| 34. U01(2-Methylnicotinamide?)               |                                                                                     | 8.06<br>8.54<br><b>8.78</b>         | <b>d</b>                 | <b>6-CH</b>                            |
| 35. Trigonelline (Trig)                      |  | 4.44<br>8.08<br>8.84<br><b>9.12</b> | s<br>m<br>m<br><b>s</b>  | N-CH3<br>5-CH<br>4,6-CH<br><b>2-CH</b> |
| 36. 1-Methylnicotinamide (1-MNA)             |  | 8.17<br>8.89<br>8.96<br><b>9.28</b> | t<br>d<br>d<br><b>s</b>  | 5-CH<br>4-CH<br>6-CH<br><b>2-CH</b>    |
